1  
2 ***Effectiveness, Explainability and Reliability of Machine Meta-***  
3 ***Learning Methods for Predicting Mortality in Patients with COVID-***  
4 ***19: Results of the Brazilian COVID-19 Registry***  
5 ***Machine Meta-Learning Methods for Predicting Mortality in***  
6 ***Patients with COVID-19 in Brazil***

7 Bruno Barbosa Miranda de Paiva<sup>1</sup>, Polianna Delfino-Pereira<sup>2,3</sup>, Claudio Moisés Valiense de Andrade<sup>1</sup>,  
8 Virginia Mara Reis Gomes<sup>4</sup>, Maria Clara Pontello Barbosa Lima<sup>5</sup>, Maira Viana Rego Souza-Silva<sup>6</sup>,  
9 Marcelo Carneiro<sup>7</sup>, Karina Paula Medeiros Prado Martins<sup>6</sup>, Thaís Lorena Souza Sales<sup>8</sup>, Rafael Lima  
10 Rodrigues de Carvalho<sup>3</sup>, Magda C. Pires<sup>9</sup>, Lucas Emanuel F. Ramos<sup>9</sup>, Rafael T. Silva<sup>9</sup>, Adriana Falangola  
11 Benjamin Bezerra<sup>10</sup>, Alexandre Vargas Schwarzbald<sup>11</sup>, Aline Gabrielle Sousa Nunes<sup>12</sup>, Amanda de  
12 Oliveira Maurílio<sup>13</sup>, Ana Luiza Bahia Alves Scotton<sup>14</sup>, André Soares de Moura Costa<sup>15</sup>, Andriele Abreu  
13 Castro<sup>16</sup>, Bárbara Lopes Farace<sup>17</sup>, Christiane Corrêa Rodrigues Cimini<sup>18,19</sup>, Cíntia Alcantara De Carvalho<sup>20</sup>,  
14 Daniel Vitório Silveira<sup>12</sup>, Daniela Ponce<sup>21</sup>, Elayne Crestani Pereira<sup>22, 23</sup>, Euler Roberto Fernandes  
15 Manenti<sup>24</sup>, Evelin Paola de Almeida Cenci<sup>25</sup>, Fernanda Barbosa Lucas<sup>26</sup>, Fernanda D'Athayde Rodrigues<sup>27</sup>,  
16 Fernando Anschau<sup>28,29</sup>, Fernando Antonio Botoni<sup>6</sup>, Fernando Graça Aranha<sup>23</sup>, Frederico Bartolazzi<sup>26</sup>,  
17 Gisele Alsina Nader Bastos<sup>16</sup>, Giovanna Grunewald Vietta<sup>22, 23</sup>, Guilherme Fagundes Nascimento<sup>12</sup>, Helena  
18 Carolina Noal<sup>11</sup>, Helena Duani<sup>6</sup>, Heloisa Reniers Vianna<sup>30</sup>, Henrique Cerqueira Guimarães<sup>17</sup>, Isabela  
19 Moraes Gomes<sup>6</sup>, Jamille Hemétrio Salles Martins Costa<sup>31</sup>, Jéssica Rayane Corrêa Silva da Fonseca<sup>32</sup>, Júlia  
20 Di Sabatino Santos Guimarães<sup>33</sup>, Júlia Drumond Parreiras de Morais<sup>30</sup>, Juliana Machado Rugolo<sup>21</sup>, Joanna  
21 D'arc Lyra Batista<sup>36</sup>, Joice Coutinho de Alvarenga<sup>20</sup>, José Miguel Chatkin<sup>34,35</sup>, Karen Brasil Ruschel<sup>25,24,3</sup>,  
22 Leila Beltrami Moreira<sup>27</sup>, Leonardo Seixas de Oliveira<sup>37</sup>, Liege Barella Zandoná<sup>37</sup>, Lílian Santos

23 Pinheiro<sup>18,19</sup>, Luanna da Silva Monteiro<sup>38</sup>, Lucas de Deus Sousa<sup>14</sup>, Luciane Kopittke<sup>28,29</sup>, Luciano de Souza  
24 Viana<sup>31</sup>, Luis César de Castro<sup>39</sup>, Luisa Argolo Assis<sup>33</sup>, Luisa Elem Almeida Santos<sup>40</sup>, Máderson Alvares de  
25 Souza Cabral<sup>6</sup>, Magda Cesar Raposo<sup>8</sup>, Maiara Anschau Floriani<sup>41</sup>, Maria Angélica Pires Ferreira<sup>27</sup>, Maria  
26 Aparecida Camargos Bicalho<sup>42</sup>, Mariana Frizzo de Godoy<sup>35</sup>, Matheus Carvalho Alves Nogueira<sup>15</sup>, Meire  
27 Pereira de Figueiredo<sup>26</sup>, Milton Henriques Guimarães-Júnior<sup>31</sup>, Mônica Aparecida de Paula De Sordi<sup>21</sup>,  
28 Natália da Cunha Severino Sampaio<sup>43</sup>, Neimy Ramos de Oliveira<sup>43</sup>, Pedro Ledic Assaf<sup>44</sup>, Raquel  
29 Lutkmeier<sup>28,29</sup>, Reginaldo Aparecido Valacio<sup>38</sup>, Renan Goulart Finger<sup>45</sup>, Roberta Senger<sup>11</sup>, Rochele  
30 Mosmann Menezes<sup>7</sup>, Rufino de Freitas Silva<sup>13</sup>, Saionara Cristina Francisco<sup>44</sup>, Silvana Mangeon Mereilles  
31 Guimarães<sup>31</sup>, Silvia Ferreira Araújo<sup>31</sup>, Talita Fischer Oliveira<sup>7</sup>, Tatiana Kurtz<sup>7</sup>, Tatiani Oliveira  
32 Fereguetti<sup>43</sup>, Thainara Conceição de Oliveira<sup>25</sup>, Thulio Henrique Oliveira Diniz<sup>13</sup>, Yara Cristina Neves  
33 Marques Barbosa Ribeiro<sup>44</sup>, Yuri Carlotto Ramires<sup>37</sup>, Marcos André Gonçalves<sup>1</sup>, Milena Soriano  
34 Marcolino<sup>3,6,46</sup>

35 <sup>1</sup> Computer Science Department, Universidade Federal de Minas Gerais, Belo Horizonte, Minas Gerais,  
36 Brazil

37 <sup>2</sup> Internal Medicine Department, Universidade Federal de Minas Gerais, Belo Horizonte, Minas Gerais,  
38 Brazil

39 <sup>3</sup> Institute for Health Technology Assessment (IATS/CNPq), Porto Alegre, Rio Grande do Sul, Brazil

40 <sup>4</sup> Centro Universitário de Belo Horizonte (UniBH), Belo Horizonte, Minas Gerais, Brazil

41 <sup>5</sup> Universidade Federal de Ouro Preto, Ouro Preto, Minas Gerais, Brazil

42 <sup>6</sup> Medical School and University Hospital, Universidade Federal de Minas Gerais, Belo Horizonte, Minas  
43 Gerais, Brazil

44 <sup>7</sup> Hospital Santa Cruz, Santa Cruz do Sul, Rio Grande do Sul, Brazil

45 <sup>8</sup> Universidade Federal de São João del-Rey. R, Divinópolis, Minas Gerais, Brazil

46 <sup>9</sup> Department of Statistics, Universidade Federal de Minas Gerais, Belo Horizonte, Minas Gerais, Brazil

47 <sup>10</sup> Hospital das Clínicas da Universidade Federal de Pernambuco, Recife, Pernambuco, Brazil

- 48 <sup>11</sup> Hospital Universitário de Santa Maria, Santa Maria, Rio Grande do Sul, Brazil
- 49 <sup>12</sup> Hospital UNIMED BH, Belo Horizonte, Minas Gerais, Brazil
- 50 <sup>13</sup> Hospital São João de Deus, São João de Deus, Minas Gerais, Brazil
- 51 <sup>14</sup> Hospital Regional Antônio Dias, Patos de Minas, Minas Gerais, Brazil
- 52 <sup>15</sup> Hospitais da Rede Mater Dei, Belo Horizonte, Minas Gerais, Brazil
- 53 <sup>16</sup> Hospital Moinhos de Vento, Porto Alegre, Rio Grande do Sul, Brazil
- 54 <sup>17</sup> Risoleta Tolentino Neves, Belo Horizonte, Minas Gerais, Brazil
- 55 <sup>18</sup> Mucuri Medical School, Universidade Federal dos Vales do Jequitinhonha e Mucuri, Teófilo Otoni,  
56 Minas Gerais, Brazil
- 57 <sup>19</sup> Hospital Santa Rosália, Teófilo Otoni, Minas Gerais, Brazil
- 58 <sup>20</sup> Hospital João XXIII, Belo Horizonte, Minas Gerais, Brazil
- 59 <sup>21</sup> Faculdade de Medicina de Botucatu - Universidade Estadual Paulista "Júlio de Mesquita Filho, Botucatu,  
60 São Paulo, Brazil
- 61 <sup>22</sup> Universidade do Sul de Santa Catarina (UNISUL), Florianópolis, Santa Catarina, Brazil
- 62 <sup>23</sup> Hospital SOS Córdio, Florianópolis, Santa Catarina, Brazil
- 63 <sup>24</sup> Hospital Mãe de Deus, Porto Alegre, Rio Grande do Sul, Brazil
- 64 <sup>25</sup> Hospital Universitário Canoas, Canoas, Rio Grande do Sul, Brazil
- 65 <sup>26</sup> Hospital Santo Antônio, Curvelo, Minas Gerais, Brazil
- 66 <sup>27</sup> Hospital de Clínicas de Porto Alegre, Porto Alegre, Rio Grande do Sul, Brazil
- 67 <sup>28</sup> Hospital Nossa Senhora da Conceição, Porto Alegre, Rio Grande do Sul, Brazil
- 68 <sup>29</sup> Hospital Cristo Redentor, Porto Alegre, Rio Grande do Sul, Brazil
- 69 <sup>30</sup> Universitário Ciências Médicas, Belo Horizonte, Minas Gerais, Brazil
- 70 <sup>31</sup> Hospital Márcio Cunha, Ipatinga, Minas Gerais, Brazil
- 71 <sup>32</sup> Hospital Semper, Belo Horizonte, Minas Gerais, Brazil
- 72 <sup>33</sup> Pontífica Universidade Católica de Minas Gerais, Belo Horizonte, Minas Gerais, Brazil

73 <sup>34</sup> School of Medicine, Pontifícia Universidade Católica do Rio Grande do Sul, Porto Alegre, Rio Grande  
74 do Sul, Brazil

75 <sup>35</sup> Hospital São Lucas PUCRS, Porto Alegre, Brazil. Rua João Cateano, 79/503. Porto Alegre, Rio Grande  
76 do Sul, Brazil

77 <sup>36</sup> Universidade Federal da Fronteira Sul, Chapecó, Santa Catarina, Brazil

78 <sup>37</sup> Hospital Bruno Born, Lajeado, Rio Grande do Sul, Brazil

79 <sup>38</sup> Hospital Metropolitano Odilon Behrens, Belo Horizonte, Minas Gerais, Brazil

80 <sup>39</sup> Hospital Tacchini, Bento Gonçalves, Rio Grande do Sul, Brazil

81 <sup>40</sup> Centro Universitário de Patos de Minas, Patos de Minas, Minas Gerais, Brazil

82 <sup>41</sup> Moinhos Research Institute, Porto Alegre, Rio Grande do Sul, Brazil

83 <sup>42</sup> Fundação Hospitalar do Estado de Minas Gerais (FHEMIG), Belo Horizonte, Minas Gerais, Brazil

84 <sup>43</sup> Hospital Eduardo de Menezes, Belo Horizonte, Minas Gerais, Brazil

85 <sup>44</sup> Hospital Metropolitano Doutor Célio de Castro, Belo Horizonte, Minas Gerais, Brazil

86 <sup>45</sup> Hospital Regional do Oeste, Chapecó, Santa Catarina, Brazil

87 <sup>46</sup> Telehealth Center, University Hospital, Universidade Federal de Minas Gerais, Minas Gerais, Brazil

88 \* Corresponding author

89 E-mail: milenamarc@gmail.com (MSM)

90

## 91 **Abstract**

92           Objective: To provide a thorough comparative study among state-of-the-art machine learning  
93 methods and statistical methods for determining in-hospital mortality in COVID-19 patients using data  
94 upon hospital admission; to study the reliability of the predictions of the most effective methods by  
95 correlating the probability of the outcome and the accuracy of the methods; to investigate how explainable  
96 are the predictions produced by the most effective methods. Materials and Methods: De-identified data  
97 were obtained from COVID-19 positive patients in 36 participating hospitals, from March 1 to September  
98 30, 2020. Demographic, comorbidity, clinical presentation and laboratory data were used as training data to  
99 develop COVID-19 mortality prediction models. Multiple machine learning and traditional statistics  
100 models were trained on this prediction task using a folded cross-validation procedure, from which we  
101 assessed performance and interpretability metrics. Results: The Stacking of machine learning models  
102 improved over the previous state-of-the-art results by more than 26% in predicting the class of interest  
103 (death), achieving 87.1% of AUROC and macro F1 of 73.9%. We also show that some machine learning  
104 models can be very interpretable and reliable, yielding more accurate predictions while providing a good  
105 explanation for the ‘why’. Conclusion: The best results were obtained using the meta-learning ensemble  
106 model – Stacking. State-of the art explainability techniques such as SHAP-values can be used to draw  
107 useful insights into the patterns learned by machine-learning algorithms. Machine-learning models can be  
108 more explainable than traditional statistics models while also yielding highly reliable predictions.

109

110 **Key words:** COVID-19; prognosis; prediction model; machine learning

111

## 112 **Introduction**

---

113 The number of patients with coronavirus disease 2019 (COVID-19), as well as the related deaths,  
114 have increased exponentially since the World Health Organization declared it a pandemic on March 2020.  
115 Up to September 24, 2021, there are over 230 million cumulative cases and 4.7 million deaths reported  
116 worldwide (1). Although over 6 billion doses of COVID-19 vaccines have been administered worldwide,  
117 due to an uneven and slow rollout, variants are emerging and outbreaks continue especially in poorer  
118 countries, meaning that COVID-19 will be an issue governments worldwide will need to keep grappling  
119 with (1,2).

120 Given the current scenario, there is an urgent need for an early disease stratification tool upon  
121 hospital admission, to allow the early identification of risk of death in patients with COVID-19, assisting in  
122 the management of disease and optimising resource allocation, hopefully assisting to save lives during the  
123 pandemic. Although several scores have been proposed for the early assessment of COVID-19 patients at  
124 hospital admission, the majority of them are bounded by methodological flaws and technological  
125 limitations, meaning that reliable prognostic prediction models are scarce (3–5).

126 A state-of-the-art method for this prediction task has recently been proposed by our group with the  
127 development of a new risk score - ABC<sub>2</sub>-SPH - using traditional statistical methods (least absolute  
128 shrinkage and selection operator - LASSO regression), which exploits a rich set of information, including  
129 patient's demographics, comorbidities, vital signs and laboratory parameters at the time of presentation, for  
130 assessing prognosis in COVID-19 patients. The model has shown high discriminatory value (AUROC  
131 0.844, 95% CI 0.829 to 0.859), confirmed in the Brazilian (0.859 [95% CI 0.833 to 0.885]) and Spanish  
132 (0.899 [95% CI 0.864 to 0.934]) validation cohorts, and with better discrimination ability than other  
133 existing scores (4).

134 In this context, artificial intelligence (AI), and more specifically machine learning (ML), techniques  
135 have been explored in various fields for dealing with the pandemic, such as detecting outbreaks, diagnosis,  
136 interpretation of chest imaging exams to detect COVID-19 lung disease, vaccines development and

137 prognosis prediction (6,7), but comprehensive comparative studies to investigate whether ML techniques  
138 have superior performance when compared to models using traditional statistical methods are still scarce.

139 Indeed in several other contexts (8) ML techniques have demonstrated superior effectiveness (i.e.,  
140 accuracy) when compared to traditional statistical methods (e.g., logistic regression), due for instance, their  
141 capability of dealing with collinearity and redundancy, as well the ability to find non-linear correlations  
142 among the variables. However, current studies in the mortality prediction for COVID-19 using ML  
143 techniques are limited, regarding either methodological or technological aspects.

144 In this scenario, the contributions of this article are fivefold. First, we provide a **thorough**  
145 **comparative study** among state-of-the-art ML methods, including many modern techniques, such as  
146 transformer and convolutional neural networks, boosting algorithms, support vector machines (SVM), k-  
147 nearest neighbors, as well as state-of-the-art statistical methods, represented by ABC<sub>2</sub>-SPH, in the task of  
148 determining **in-hospital mortality** in COVID-19 patients using data **upon hospital admission**.

149 Second, given the profusion and diversity of the compared methods, we investigate the  
150 effectiveness of meta-learning ensemble strategies, most notably Stacking (9), that combine the methods'  
151 outputs (probabilities), in order to exploit the ML methods' strengths and overcome their limitations.

152 Third, we study the **reliability** of the predictions of the most effective methods by correlating the  
153 probability of the outcome and the effectiveness (accuracy) of the methods. Few studies have investigated  
154 this important aspect of the predictions, which has practical impact in the applicability of the methods.  
155 Fourth, we investigated how **interpretable** (or explainable) are the predictions produced by the most  
156 effective methods using modern interpretability tools. Explainability is an essential aspect of the task if ML  
157 methods are to be trusted and actually used by practitioners.

158 Finally, we provide a discussion on the adequacy of AUROC as an evaluation metric for highly  
159 imbalanced and skewed datasets commonly found in health-related problems, as is the case of our COVID-  
160 19 study.



## 161 **Related Work**

162 This study also included a narrative review of the scientific literature on existing prediction models  
163 for COVID-19 mortality using artificial intelligence techniques. These models were identified through a  
164 literature search of Medline and MedRxiv, with no language or date restrictions, using the search not  
165 indexed terms: “COVID-19”, “SARS-CoV-2”, combined with “mortality”, “prognosis”, “risk factors”,  
166 “hospitalizations” or “score”. The last search was performed in August 2021.

167 Following the narrative analysis, our initial search highlighted papers that satisfied our search  
168 criteria, removing duplicates, leaving relevant articles for the title and abstract review. Text screening  
169 retained 76 studies included in the S1 Table.

170 The existing literature largely focuses on American and Chinese hospitals, represented together by  
171 53.94% of studies. In fact, models validated in one country cannot be extrapolated to the population as a  
172 whole, since there is heterogeneity among countries in different characteristics such as populations features  
173 (including genetics, race, ethnicity, prevalence of comorbidities), socioeconomic factors, access to  
174 healthcare, and the healthcare systems themselves (hospitals patient load, practice and available resources)  
175 (10).

176 Another important point is the sample size. Larger population studies are needed to allow certain  
177 metrics of model performance to be estimated with more accurate and reliable results. In contrast, smaller  
178 samples reduce the ability to identify risk factors and increase the likelihood of overfitting (11). Among the  
179 analyzed models, 17.10% were developed and validated with a modest sample of 500-1000 patients, and  
180 35.52% used even a smaller sample, with less than 500 patients. Only 47.36% of the studies used a sample  
181 with more than 1000 patients. Our sample used in this study has 5032 patients.

182 Most of the studies (60.52%) used traditional statistical methods, including multivariate logistic  
183 regression, LASSO and Cox regression analysis. Artificial intelligence techniques were used in 39.47% of  
184 studies, among them stands out machine learning, including random forest (RF), XGBoost and SVM. And

185 only a very small percentage (11.8%) of works exploit modern neural network methods in their studies as  
186 we do in ours.

187 Overall, the majority of developed models are limited by methodological bias, with for example,  
188 absence of external validation in 51.31%, so the assessment of accuracy in those studies may be  
189 overestimated. A minority of them (around 23.68%) reported having followed the methodological  
190 recommendations from Transparent Reporting of a multivariable prediction model for Individual Prognosis  
191 Or Diagnosis (TRIPOD) (11).

192 The model performance was evaluated in most studies, by area under the curve (AUC), and the  
193 mean AUC for training ranged from 0.64-0.96 for traditional statistical methods, and from 0.74-0.96 for  
194 models using AI techniques. However, due to the very high skewness of the datasets (i.e., mortality  
195 corresponds to a very low percentage of the cases in the datasets, in other words, the non-death class  
196 dominates the distribution) neither AUC nor accuracy are adequate metrics (12).

197 To properly assess the performance of different models, it is of utmost importance to use other  
198 metrics that consider imbalance issues, such as macro-average F1-score (macro-F1), used in 13.33%  
199 studies. For example, Li et al (2020) developed a deep-learning model and a risk-score system based on 55  
200 clinical variables and observed that the most crucial biomarkers distinguishing patients at mortality  
201 imminent risk, were age, lactate dehydrogenase, procalcitonin, cardiac troponin, C-reactive protein and  
202 oxygen saturation (13). The deep-learning model predicted mortality with an AUC of 0.852 and 0.844, for  
203 training and testing, respectively, which is considered excellent (13). However, the performance of the  
204 proposed algorithm on training and testing datasets measured by the F1-score was 0.642 and 0.616,  
205 respectively (13).

206 Finally, few studies (S1 Table) deep analyzed the impact of the variables in the final model or on  
207 the final model outcome. Additionally, most studies do not investigate how reliable the made predictions  
208 are in terms of the correlation between the probability of the prediction and the accuracy. This analysis has

209 implications on the practical use of this technology. An accurate but unreliable method has its practical  
210 applicability diminished. We explicitly tackle these issues in our study.

## 211 **Materials and Methods**

212 This is a substudy of the Brazilian COVID-19 Registry, a multi-hospital cohort study previously  
213 described (14). Complying with the study protocol, adult patients with laboratory-confirmed COVID-19  
214 according to the World Health Organization criteria, admitted consecutively in any of the 36 participating  
215 hospitals, from March 1 to September 30, 2020 were enrolled. Individuals were not included if they were  
216 transferred between hospitals and data from the first or last hospitals was not available, as well those who  
217 were admitted for other reasons and developed COVID-19 symptoms during their stay (4).

218 Trained hospital staff or interns collected demographic information, clinical characteristics,  
219 laboratory and outcome data from medical records. A prespecified case report form was used, applying  
220 Research Electronic Data Capture (REDCap) tools (15). To ensure data quality, comprehensive data quality  
221 checks were undertaken. Error checking code was developed in R to identify data entry errors, as  
222 previously described (4), and the results were sent to each center for checking and correction before further  
223 data analysis.

224 Variables used to develop the models were obtained upon hospital presentation. A set of potential  
225 predictor features for in-hospital mortality was selected a priori, as recommended, from demographics,  
226 home medications, past medical history, clinical features, and laboratory values (S2 Table) (4,11).  
227 Laboratory exams were performed at the discretion of the treating physician. The ABC<sub>2</sub>-SPH score is  
228 composed by age, blood urea nitrogen, number of comorbidities, C-reactive protein, SpO<sub>2</sub>/FiO<sub>2</sub> ratio,  
229 platelet count and heart rate (4).

## 230 **Data analysis**

231 The development, validation and reporting of the models followed guidance from the TRIPOD  
232 (Transparent Reporting of a multivariable prediction model for Individual Prognosis Or Diagnosis)

233 checklist and the Prediction model Risk of Bias Assessment Tool (PROBAST) (11,16). All data was fully  
234 anonymized. At that time 36 Brazilian hospitals participated in the cohort, located in 17 cities, from five  
235 Brazilian states (4).

236

237 A total of 5032 patients were admitted between March 1, 2020 and September 31, 2020, and the full  
238 group was used to perform a 10-fold cross validation procedure, which was repeated 3 times (at a total of  
239 30 performance measurements for each of the classifiers presented in our study). The overall study  
240 population included 45.9% women, with a mean age of 60 (standard deviation [SD] 17) years, 1367  
241 (27.17%) needed mechanical ventilation and 1014 (20.15%) died.

242 In order to properly assess the performance of different models, we chose to use three different  
243 metrics, each assessed through the aforementioned 10-fold cross validation procedure, for each classifier.  
244 Our evaluation metrics include both micro-average and macro-average F1-score (micro-F1 and macro-F1),  
245 and the area (AUROC) under the receiver operating curve (ROC-Curve). While more common in  
246 healthcare-related literature, the AUROC values can be misleading, especially when there is significant  
247 class imbalance (17), and even more so when the class of interest is the rare one (which is usually the case).  
248 Therefore, we included the micro and macro-F1 scores as evaluation metrics. The F1 score is the harmonic  
249 mean between precision and recall scores, for each class (i.e. one score to estimate how well the model can  
250 predict which patients will die, and one to estimate the same regarding which patients will not die). The  
251 "average" part, described as either "micro" or "macro", refers to how these results are aggregated. In  
252 "macro" averaging, all classes are taken as equally important, while in "micro" averaging, class imbalance  
253 is not accounted for in the final result and all individual predictions are considered equally important (18).

254 As for the specific models compared in our study, we trained two modern neural network  
255 benchmarks -- the FNet transformer, with and without virtual adversarial training, which is a regularization  
256 technique -- and a deep convolutional Resnet. We also experimented with a support vector machine

257 classifier, a boosting model (microsoft research's Light Gradient Boosting Machine), and the K-nearest  
258 neighbors algorithm, as well as a stacking of these methods.

259 We compare these ML alternatives to traditional statistical methods, including a Generalized  
260 Additive Model (GAM), which has rarely been used in this scenario before, and LASSO regression, the  
261 current state-of-the-art. GAM was used before in ABC<sub>2</sub>-SPH, but only to select variables for the lasso  
262 regression, which yielded an inferior result when compared to LASSO regression, whereas in our work, we  
263 directly tune GAM to the classification task, thus obtaining better results, as we shall see.

264 The choice of neural networks to include in our study was motivated by current state-of-the-art  
265 methods, even though, in general, neural networks tend to perform better in situations where massive  
266 amounts of data are available, which is not our case, as we have a relatively small data sample (12,19).  
267 Usually, the ability to compare distant input positions in the query vectors is related to the neural network's  
268 depth. Transformer architectures, as introduced by Vaswani et al (2017), gained rapid success due to their  
269 capacity of doing so in a constant number of operations, achieving state-of-the-art results in many tasks  
270 (20). That is the reason we chose a FNet Transformer classifier. For comparison purposes, we also included  
271 a Resnet model, which held similar success for image classification, due to the capacity of building very  
272 deep networks. Due to the relative drop in performance of neural networks when fewer data samples are  
273 present in training, we also include a training variant where we perform virtual adversarial training, as  
274 introduced in Miyato et al (2017), in which the model's decision boundary is smoothed in the most  
275 anisotropic direction through a gradient-based approximation (21).

276 Additionally, we included a standard support vector machine classifier, which learns a separation  
277 hyperplane between classes, while maximising the separation margin, and a K-nearest neighbors classifier,  
278 which yields predictions based on spatial similarities between training samples and new query points.  
279 Motivated by the results shown in Shwartz et al (2021) (22), we included a boosting algorithm  
280 (LightGBM), which is usually an effective model in tabular data, as concluded in Ke et al (2017) (23). As  
281 the final classifier, we included a meta-learning ensemble-based Stacking model, which learns to combine

282 the prediction outputs of all previous classifiers in order to improve classification effectiveness. We  
 283 compare these methods to Generalised Additive Models (GAM) and LASSO regression, the latter being the  
 284 current state-of-the-art model for this task, as demonstrated in our previous work.

285 We ran all classification tests using a 10 fold cross validation procedure, after which we calculated  
 286 confidence intervals for each result, and confirmed statistical significance by applying a Wilcoxon signed-  
 287 rank test with 95% confidence.

288 For the parametrization of our models, we used the values presented in Table 1, where the values in  
 289 brackets are evaluated in the validation set of the cross validation process. For deep network models we use  
 290 the early stop to optimize the model, which optimizes the weights until the model has no significant  
 291 improvement in the validation set.

**Table 1. Parameterization of methods.**

| Method     | Parametrization                                                                                                                                        |
|------------|--------------------------------------------------------------------------------------------------------------------------------------------------------|
| SVM        | C: [ $10^{-3}$ , $10^{-2}$ , $10^{-1}$ , $10^0$ , $10^1$ , $10^2$ ]<br>Kernel: [linear, rbf, poly, sigmoid]<br>class_weight: [None, 'balanced']        |
| RF         | N-estimators: [10, 50, 100, 200, 500, 1000, 2000]                                                                                                      |
| KNN        | Neighbors: [2, 4, 8, 16, 32]                                                                                                                           |
| LASSO      | Alpha: [ $10^{-3}$ , $10^{-2}$ , $10^{-1}$ , $10^0$ , $10^1$ , $10^2$ ]                                                                                |
| LIGHT_GBM  | N-estimators: [10, 50, 100, 200, 500, 1000, 2000]<br>learning_rate: [ $10^{-3}$ , $10^{-2}$ , $10^{-1}$ , $30^{-1}$ ]<br>colsample_by_tree: [0.5, 1.0] |
| CNN        | Early Stop                                                                                                                                             |
| FNet       | Early Stop                                                                                                                                             |
| FNet + VAT | Early Stop                                                                                                                                             |
| GAM        | No tuning                                                                                                                                              |
| Stacking   | Meta-Classifer: Logistic Regression, Alpha: [ $10^2$ ]                                                                                                 |

292 List of model names: CNN = convolutional neural network, FNet = fourier transformation neural network,  
 293 FNet + VAT = fourier transformation neural network with virtual adversarial training, GAM = generalized

294 additive models, KNN = K-nearest neighbors, LASSO = lasso regression, LIGHT\_GBM = light gradient  
295 boosting machines, RF = random forest, SVM = support vector machines, STACKING = a stacking  
296 classifier, which combines all others.

## 297 **Results and Discussion**

298 Classification results for the prediction of death can be found in Table 1. Neural network models  
299 (CNN - convolutional neural networks - and FNet - Fourier transform neural network - / FNet + VAT -  
300 Fourier transform neural network + virtual adversarial training) produced the worst results while boosting  
301 ('LightGBM' - Light Gradient Boosting Machine), Stacking and one traditional statistical models  
302 ('Generalized Additive Models - GAM') produced the best overall results, when considering both, micro  
303 and macro-F1, and AUROC. It is interesting to notice that GAM surpassed LASSO, which was used in our  
304 ABC<sub>2</sub>-SPH score and was considered the previous state-of-the-art.

305 The less effective results of the Neural network are somewhat expected as the size of the dataset is  
306 not that huge, with fewer than 10 thousand samples. Typically, we expect neural networks of large capacity  
307 (millions to billions of parameters) to excel in tasks where very large datasets are available (millions to  
308 billions of training instances), which is very rare in health-related problems. In such large-scale datasets,  
309 neural networks can capture very complex relationships. However, in smaller sample sizes, they show a  
310 remarkable tendency to overfit, hence obtaining poor results in terms of validation error (12,19).

311 In general, tree-based ensemble models such as random and boosting forests tend to be more robust  
312 to small sample sizes and to overfitting, which is exactly the behavior we observed in our experiments (24).  
313 SVM and K-nearest neighbors (KNN), which are simpler models, with fewer parameters, also tend to  
314 perform reasonably well on smaller datasets being better than the neural network models.

315 We should stress that the statistical models LASSO regression and mainly Generalized additive  
316 models (GAM) showed very competitive results for this data sample. Unexpectedly, GAM was the runner  
317 up method considering all metrics, being even better than LASSO and some traditional ML methods such



318 as SVM and KNN. This result contrasts with the one in ABC<sub>2</sub>-SPH, where GAM was used simply to select  
319 variables for the LASSO regression. In our work, we directly tuned GAM to the classification task, using  
320 the cross-validation procedure, which yielded superior performance. GAM and LightGBM are statistically  
321 tied regarding all evaluation metrics considering a Wilcoxon signed-rank test with 95% confidence.

322 In any case, the best single overall model, with statistical significance, under all considered metrics,  
323 was the Stacking model, which is a combination of the output of all other individual models, which, in  
324 turn, exploited all the provided features (S2 Table), including demographic data, comorbidities, lifestyle  
325 habits, clinical assessment and laboratory data upon hospital admission: age; days from symptom onset;  
326 heart and respiratory rate, mechanical ventilation, oxygen inspiration fraction, platelets, urea, C-reactive  
327 protein, lactate, gasometry results (pH, pO<sub>2</sub>, pCO<sub>2</sub>, bicarbonate), hemogram parameters (hemoglobin,  
328 neutrophils, lymphocytes, neutrophils to lymphocytes ratio, platelets) and sodium upon hospital  
329 admission. When considering micro and macro-F1, F1 for death and AUROC at the task of predicting  
330 death, Stacking was significantly (statistically) better than all other models. The largest gains were in F1 to  
331 predict death with gains of up more than 26% over LASSO, the previous state-of-the-art.

332 Indeed, we observe in Table 2 that the combination of models by means of Stacking yields  
333 statistically significant improvements over all the best individual single models (RF, Boosting and GAM),  
334 allowing us to better discriminate between patients with higher clinical risk at admission time. The  
335 Stacking technique improves the F1-score results for the class of interest (death) by 7% over RF, by 5% for  
336 LightGBM and by 6% for GAM, which were the three individual best models in this metric. The  
337 combination of models based on different classification premises, potentially made stacking more robust. If  
338 a single classifier makes a wrong prediction, the others can still make corrections (since the predictions are  
339 independent), increasing the robustness of the final stacking model.

**Table 2. Micro-F1, macro-F1 and AUROC results for the prediction of COVID-19 in-hospital death.**

|  | <b>MICRO-F1</b> | <b>MACRO-F1</b> | <b>F1 (DEATH)</b> | <b>F1 (NO DEATH)</b> | <b>AUROC</b> |
|--|-----------------|-----------------|-------------------|----------------------|--------------|
|--|-----------------|-----------------|-------------------|----------------------|--------------|



|                   | mean         | CI    | mean         | CI    | mean         | CI    | mean         | CI    | mean         | CI    |
|-------------------|--------------|-------|--------------|-------|--------------|-------|--------------|-------|--------------|-------|
| <b>KNN</b>        | 0.807        | 0.002 | 0.492        | 0.007 | 0.091        | 0.014 | 0.892        | 0.001 | 0.781        | 0.010 |
| <b>FNet + VAT</b> | 0.810        | 0.013 | 0.677        | 0.020 | 0.470        | 0.038 | 0.884        | 0.009 | 0.772        | 0.019 |
| <b>FNet</b>       | 0.814        | 0.008 | 0.686        | 0.017 | 0.486        | 0.030 | 0.887        | 0.005 | 0.789        | 0.015 |
| <b>CNN</b>        | 0.815        | 0.013 | 0.693        | 0.016 | 0.500        | 0.026 | 0.886        | 0.009 | 0.796        | 0.016 |
| <b>SVM</b>        | 0.839        | 0.010 | 0.691        | 0.031 | 0.478        | 0.058 | 0.904        | 0.005 | 0.833        | 0.012 |
| <b>LASSO</b>      | 0.842        | 0.009 | 0.677        | 0.024 | 0.446        | 0.044 | 0.908        | 0.005 | 0.859        | 0.006 |
| <b>LIGHT_GBM</b>  | 0.846        | 0.008 | 0.723        | 0.016 | 0.538        | 0.028 | 0.908        | 0.005 | 0.865        | 0.008 |
| <b>GAM</b>        | 0.847        | 0.006 | 0.720        | 0.014 | 0.532        | 0.026 | 0.908        | 0.003 | 0.855        | 0.012 |
| <b>RF</b>         | 0.850        | 0.005 | 0.717        | 0.013 | 0.524        | 0.024 | 0.911        | 0.003 | 0.863        | 0.007 |
| <b>STACKING</b>   | <b>0.855</b> | 0.007 | <b>0.739</b> | 0.018 | <b>0.564</b> | 0.032 | <b>0.913</b> | 0.004 | <b>0.871</b> | 0.007 |

List of model names, from top to bottom (ordered by MicF1): CNN = convolutional neural network, FNet = fourier transformation neural network, FNet + VAT = fourier transformation neural network with virtual adversarial training, GAM = generalized additive models, KNN = K-nearest neighbors, LASSO = lasso regression, LIGHT\_GBM = light gradient boosting machines, RF = random forest, SVM = support vector machines, STACKING = a stacking classifier, which combines all others.

As an additional final analysis, given the popularity of this metric in the health domain, we generated ROC curves for all evaluated models, shown in Fig 1. From this Figure, we can see the separation of two distinct groups. There is a group of models with inferior results, composed of neural network models and K-nearest neighbors, and a group of models with superior (indistinguishable) results, consisting of SVM, RF, LightGBM, GAM and the Stacking of models. Despite similarities in the curves and at AUROC values, these classifiers can yield quite different results when compared with micro-F1 and macro-F1, or class-specific F1 scores, which shows that (1) AUROC score is not an adequate metric for evaluating and comparing models, especially in face of high imbalance/skewness and that (2) even though some models, like Stacking and GAM have very similar AUROC scores, their capacity to discriminate

354 relevant outcomes like death is quite different (0.532 F1 score for GAM end 0.564 for Stacking, a  
355 significant difference of 6%).

356 Another interesting remark is that, using such curves, we can sensibly calibrate the trade-off  
357 between sensitivity and specificity, further customizing the way such models can be used. In particular,  
358 when applying Stacking, our model can be tailored to the early identification of high-risk patients with  
359 good discrimination capacity.

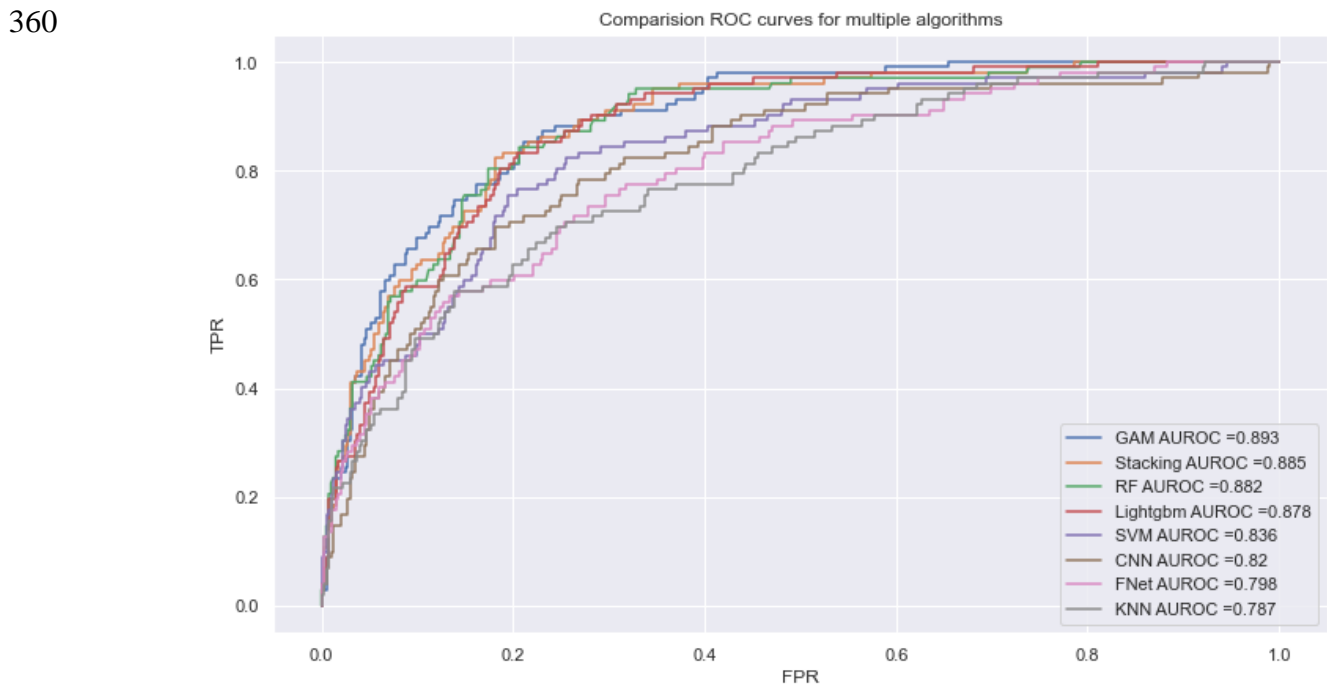

361 **Fig 1. Receiver Operating Characteristic (ROC) Curve comparing multiple models, trained on the**  
362 **prediction of the death outcome.**

### 363 **Explainability**

364 Various prognostic factors have been proposed in the stratification of COVID-19 patients, based on  
365 their risk of death, that includes clinical, laboratory and radiological variables. Among these risk factors,  
366 stand out advanced age, multiple comorbidities on admission (such as hypertension, diabetes mellitus,  
367 cardiovascular diseases and others), abnormal levels of C-reactive protein (CRP), lymphocytes, neutrophils,  
368 D-dimer, blood urea nitrogen (BUN) and lactate dehydrogenase (LDH).

369 A very interesting feature of some ML models, in particular decision trees, RF and boosting forests,  
370 is the explainability of these models. This is still a very active research area, but modern advances in tools  
371 and visualization alternatives allow us to represent which features were most important to the model and at  
372 which polarities and intervals. The best model in our tests was the Stacking. However, this is a meta-model  
373 whose inputs are the outputs of other classifiers. Because of that, and since we want to explain a classifier  
374 that works on the level of the features themselves instead of a meta-level of other classifier outputs, we will  
375 provide explanations for the second best model, LightGBM. Furthermore, tree-based boosting and bagging  
376 algorithms rank as some of the most explainable machine learning models, and also lead many benchmarks,  
377 particularly for tabular data where data samples are not that large. Their unique combination of  
378 explainability, reliability and performance, added to the fact that stacking is a meta-classifier are why we  
379 will exploit the boosting model (which, in our case, outperformed the bagging model - random forests/RF)  
380 to analyse the found correlations among variables.

381 In a sense, some traditional models, such as regression models, also have a good explainability, as  
382 we can assess the coefficients of each attribute to measure how important a feature is. These models  
383 however do not measure up to modern tree-based algorithms in many scenarios, especially in cases with  
384 larger datasets (25). Another key difference between these models is that, in the case of regression models,  
385 we have to explicitly remove collinear variables, but these variables, even though they might not improve  
386 classification performance, still yield valid model explanations. In addition to that, tree based models can  
387 return explanations in the form of intervals, such as the behavior seen in Fig 2 for sodium and bicarbonate  
388 levels, which imply there is a 'safe interval' at which death risk is lower, while either extreme (i.e. too low  
389 or too high) has a predictive value for the possibility of a COVID-19 related death.

390 From a clinical perspective, our results, shown in the Figures, are in line with a recent study with  
391 patients from two hospitals in London, which has shown that hyponatremia and hypernatremia during  
392 COVID-19 hospitalization are associated with a higher risk of death and respiratory failure, respectively  
393 (26). With regards to bicarbonate, low levels are related to acidosis, and high levels are usually related to

394 advanced chronic obstructive pulmonary disease (COPD) with retention of carbon dioxide, both of them  
395 conditions well-known to be associated with worse prognosis in clinical practice (27–29). This sort of non-  
396 linearity cannot be captured by simple regression models, since we can only measure how large coefficient  
397 values are, and correlate that to the importance of each feature.

398 In decision tree based algorithms, however, each node represents a feature. The closer to the root  
399 (i.e. the 'first' node of each tree), the more the feature is able to differentiate the data classes. For example,  
400 in Fig 2, feature 'SF ratio" with the value less than 233 and the feature 'lactate' with a value less than 1.68  
401 mmol/L results in a subset with 5.9% of the dataset where the 'death' outcome is more common.

402 Sample decision tree with max\_depth=2 from our dataset

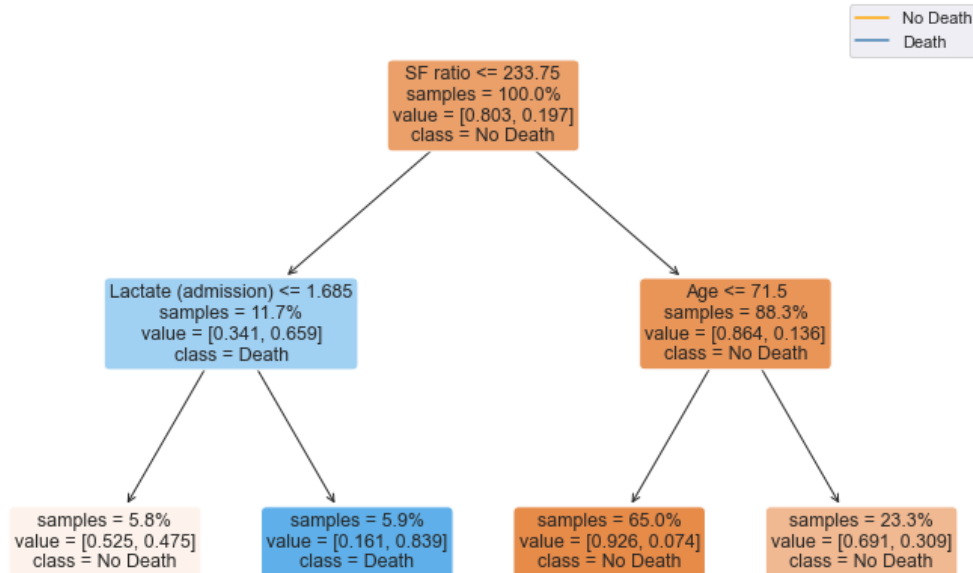

403 **Fig 2. A sample decision tree with depth 2, trained on our dataset. At each level but the last, the first**  
404 **line of text in each box shows the variable and its cut before the split.**

405 These algorithms look for the values of the features that further separate the classes, while trying to  
406 decrease the coefficient or entropy values of the class label (which are measures of purity and information)  
407 in each partition in each decision tree -- this coefficient is called the GINI Index. Such index and the  
408 entropy score tend to isolate records that represent the most frequent class in a branch.

409 In Fig 3, we present SHapley Additive exPlanation (SHAP) values for our boosting model. This is a  
410 special type of explainability technique, which allows us to not only probe which features were important  
411 to the model, but also which polarities or intervals push predictions to each of the training classes and,  
412 additionally, allows us to evaluate why the model predicted any single instance (30).

413

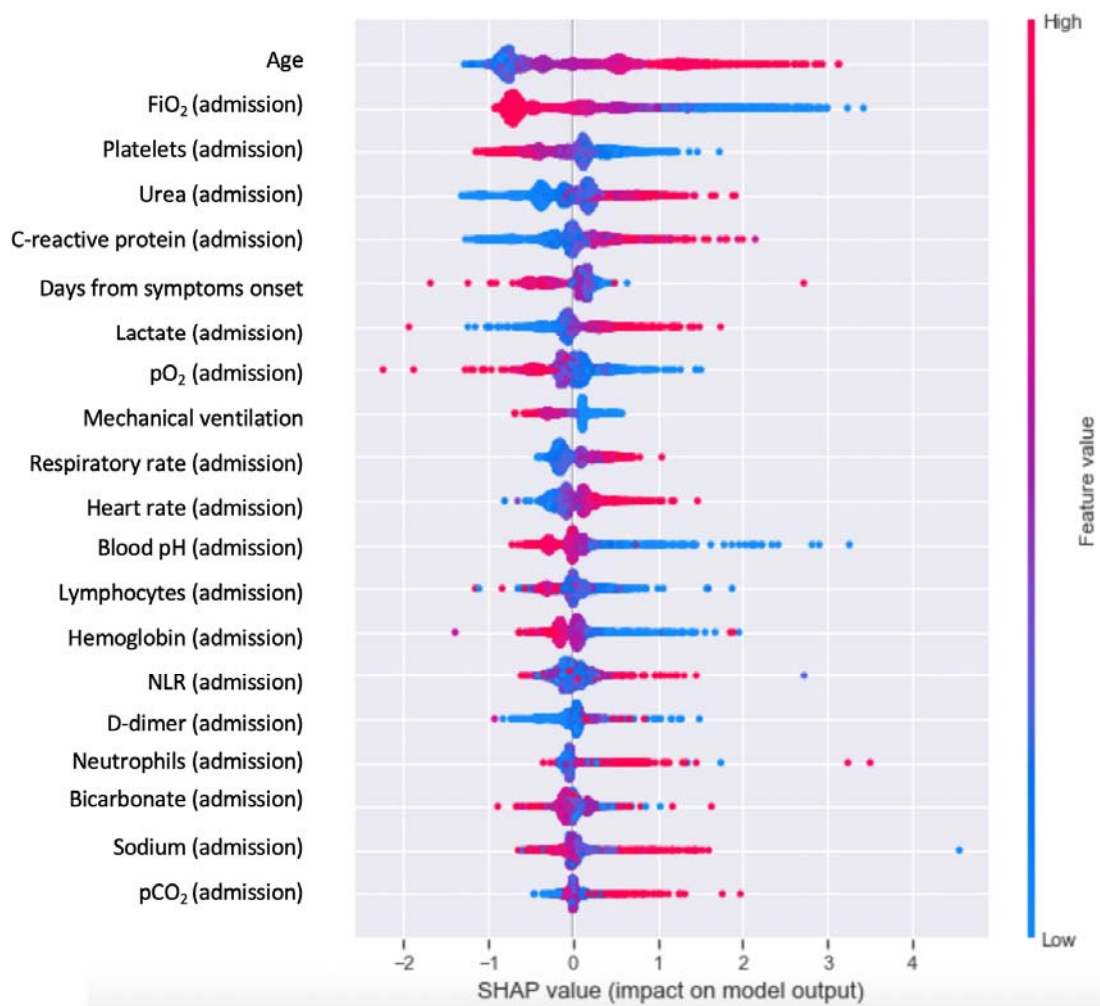

414 **Fig 3. SHAP values for the LightGBM model trained on the prediction of the death outcome.**

415 For any simple model, such as regression, the model itself is a reasonable explanation of what was  
416 learned. However, for more complex models, which in turn are capable of learning more complex solutions  
417 (provided enough data is present at training time), we cannot use the model to explain itself, since it is a  
418 complex solution. In these situations, shapley values build upon the idea that the explanation of a model  
419 can itself be a model. This technique was introduced recently by Lundberg et al (2020), and further expands

420 on the explainability of machine learning models, making them even more useful, as they become more  
421 interpretable (30).

422 With the help of SHAP values in Figs 3 and 4, we can extract interesting knowledge from our  
423 boosting model, the best individual ML model that works with the base features. We can see for instance  
424 that the most important feature in the prediction of death COVID-19 is age. This is coherent with previous  
425 medical literature, and serves as an additional validation to the model. Other scores and a recent meta-  
426 analysis have shown age as a key prognostic determinant in COVID-19 (31–34). The meta-analysis  
427 included more than half million of COVID-19 patients from different countries, and observed that the risk  
428 increased exponentially after the fifth decade of life. It is important to highlight that this fact could be  
429 influenced by both the physiological aging process and, especially by the individuals functional status and  
430 reserve, what may hinder the intrinsic capacity to fight against infections, increasing susceptibility to the  
431 infection and severe clinical manifestations (35).

432

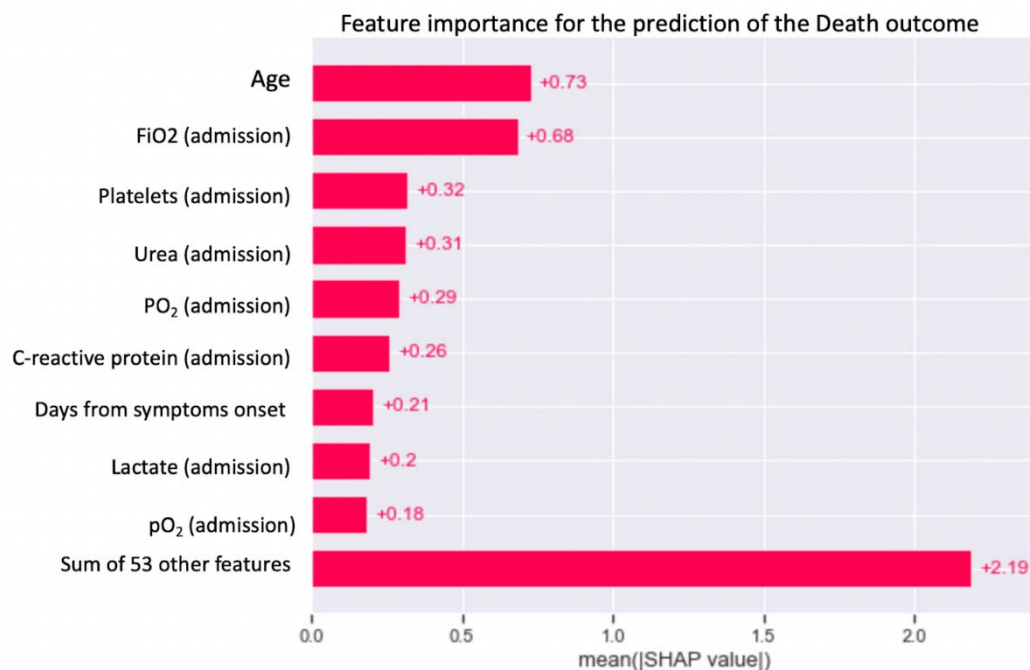

433 **Fig 4. Mean SHAP values for each feature in the prediction of either death.**

434 A recent Brazilian study in a center not included in the present analysis observed that frailty  
435 assessed using the Clinical Frailty Scale is a key predictor of COVID-19 prognosis. The authors identified

436 different mortality risks within age and acute morbidity groups. As our study was based on chart review  
437 only, we could not assess frailty, but we agree with study authors that it must not be neglected when  
438 assessing COVID-19 prognosis. In addition to helping identify patients with a higher risk of death, it can be  
439 valuable in guiding evidence-based discussions on realistic goals patients can achieve (35).

440 The second most important feature is the supplemental oxygen requirement, which, as per Fig 3,  
441 lower values (blue tones) indicate higher risk. Although COVID-19 is a multisystem disease, it is well  
442 known that lung involvement is the mainstay for assessing disease severity, and oxygen requirement upon  
443 hospital admission has been shown to be an independent predictor for severe COVID-19 in several studies  
444 (36,37).

445 Still in this analysis, lower values of platelets also increase risk of mortality, as well as higher levels  
446 of urea and C-reactive protein, which was in line with what was previously observed (38). Other studies  
447 suggest that C-reactive protein was a marker of a cytokine storm developing in patients with COVID-19  
448 and was associated with the disease mortality (39–41).

449 An interesting behavior that we can observe with SHAP values and which might not be possible to  
450 analyze with a simple regression model, is the one seen in features like admission sodium and bicarbonate  
451 serum levels, in which there is a "safe zone" for which risk is lower, but values either too high or too low  
452 yield higher risk. This is an intrinsic limitation of regression models, and the variable may be seen as non-  
453 significant due to the fact that it is a non-linear association.

454 As previously mentioned, an important limitation of regression models is collinearity. When  
455 exploiting LASSO regression in our previous work (4), we had to exclude some features which had shown  
456 to be important in the boosting model due to high collinearity. This may explain the difference in the  
457 features included in both models, despite the fact that all features included in both had previous evidence of  
458 association with COVID-19 prognosis.

459 Another interesting remark is shown in Fig 4, in which we can see the relative importance of each  
460 feature. Here, again, age is the most important single feature (due to higher mean SHAP value), which is in



461 line with previous studies (3,31,32). In an American study in intensive care units, age has shown higher  
462 discriminatory capacity when used in isolation (AUC 0.66) than the Sequential Organ Failure Assessment  
463 (SOFA) score (0.55) for mortality prediction, in a cohort study of adult patients from 18 ICUs in the US,  
464 with COVID-19 pneumonia. This score is widely used at emergency departments and ICUs worldwide to  
465 determine the extent of a person's organ function or rate of failure (42). In the present study, the remaining  
466 features, when combined, yield higher predictive value in this task than just age.

## 467 **Reliability**

468 Finally, we investigate issues related to the reliability of the models. Neural network models are, for  
469 instance, known for having irregular error rates, regardless of prediction confidence. At the other end of the  
470 spectrum, boosting and bagging models tend to have a very interesting reliability profile, with a tendency to  
471 have lower error rates at high confidence scores, and higher error rates at lower confidence scores. This  
472 generates a very useful perspective, in which we can tune the trade-off between accuracy and sensitivity for  
473 some specific classifiers.

474 Accordingly, we show in Fig 5 the reliability profile for our best model (Stacking). In this Figure,  
475 the x-axis shows prediction ranges for the model's confidence score, while the y-axis shows the percentage  
476 of hits or misses for the model. Note that the model makes more correct predictions (hits, in green) when it  
477 is more certain of the prediction (range 0.87-0.96). As seen in Fig 5, this classifier yields a useful reliability  
478 profile with respect to its confidence score. This kind of characteristic means we can tune how many  
479 patients the model will indicate, as well as how sensitive or specific that indication can be. Such tuning can  
480 be tailored to any specific healthcare service, accounting for intensive care unit beds, available  
481 professionals and so on.



482

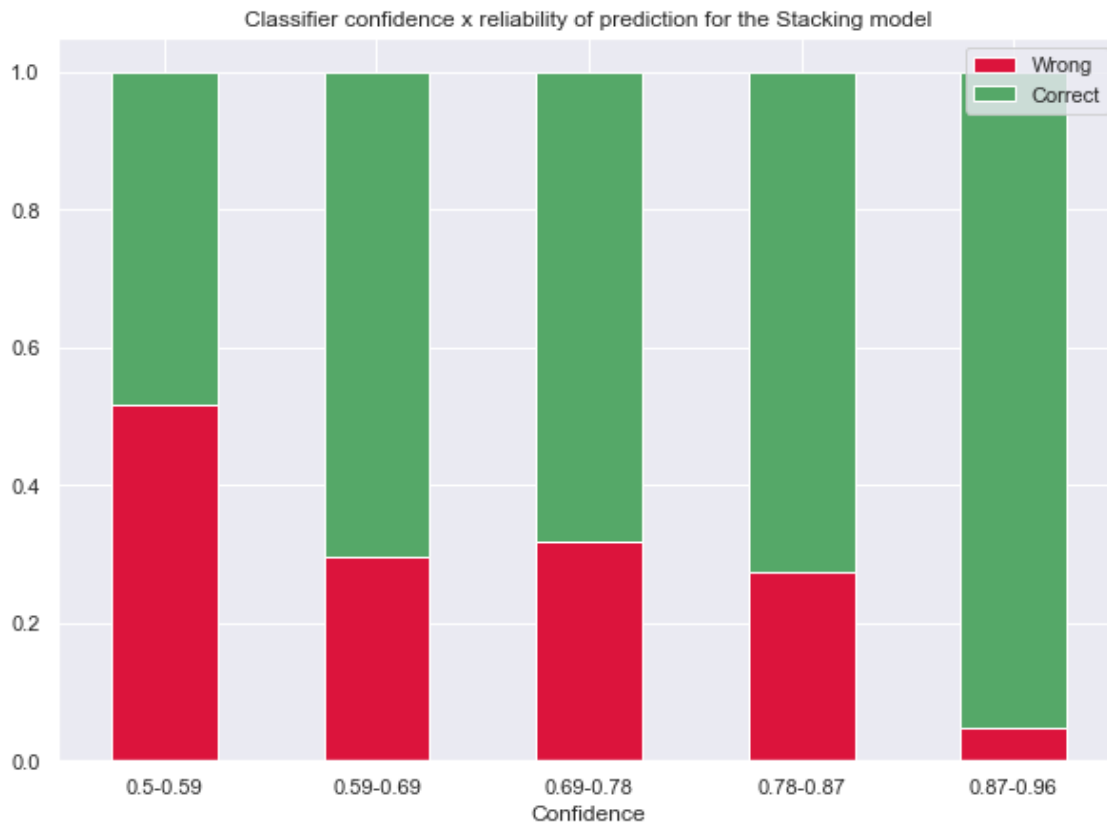

483 **Fig 5. Error rates for each confidence threshold in the Stacking model.**

484 In recent months, COVID-19 mortality prediction models were published ranging from simplified  
485 scores to machine learning. Based on S1 Table, there were few prediction studies that had extensive  
486 analysis utilizing AI techniques. In this study, AI techniques were compared to traditional statistical  
487 methods to develop a model to predict COVID-19 mortality, considering demographic, comorbidity,  
488 clinical presentation and laboratory analysis data. We observed that regarding the prediction of the class of  
489 interest (death), the best individual methods was a ML one (LightGBM) closely followed by a statistical  
490 model (GAM), both being better than neural network models, and both being surpassed by a meta-learning  
491 ensemble model -- Stacking -- which was the best overall solution considering all criteria for the posed  
492 prediction problem.

493 We would like to stress that, despite the fact that in medical research the AUROC is widely used as  
494 the sole measure of models' discriminatory ability, our data reassured us that it is an insufficient metric for  
495 evaluating and comparing models. In contrast, F1 Score is a more robust metric, especially in larger, more

496 complex and imbalanced datasets, which are common in health-related scenarios. Among the variables  
497 analyzed, age was the main mortality risk predictor, similar to other studies, while urea, C-reactive protein,  
498 lactate, respiratory rate, heart rate, NRL, neutrophils, sodium and pCO<sub>2</sub> have been shown to significantly  
499 influence the disease outcome (according to Fig 3).

## 500 **Conclusion**

501 In this study, modern AI techniques were compared to traditional statistical methods to develop a  
502 model to predict COVID-19 mortality with demographic, comorbidity, clinical presentation and laboratory  
503 analysis data. In our experiments, ML models excel in the task, with a meta-learning strategy based on  
504 Stacking surpassing the state-of-the-art LASSO regression method by more than 26% for predicting death.  
505 As a side effect of our study, we demonstrated that AUROC score was an insufficient metric for evaluating  
506 and comparing models. Even though some models, like Stacking and GAM have very similar AUROC  
507 scores, their capacity to discriminate relevant outcomes like death is quite different (0.53 F1 score for  
508 GAM and 0.56 for Stacking, which yields an 5.6% difference). Finally, we investigated issues related to the  
509 explainability and prediction reliability of the best ML models, concluding that they are potentially very  
510 useful for practical purposes in real settings.

## 511 **Acknowledgment**

512 We would like to thank the hospitals which are part of this collaboration, for supporting this project:  
513 Hospital Bruno Born; Hospital Cristo Redentor; Hospital das Clínicas da Faculdade de Medicina de  
514 Botucatu; Hospital das Clínicas da UFMG; Hospital das Clínicas da Universidade Federal de Pernambuco;  
515 Hospital de Clínicas de Porto Alegre; Hospital Santo Antônio; Hospital Eduardo de Menezes; Hospital  
516 João XXIII; Hospital Julia Kubitschek; Hospital Mãe de Deus; Hospital Márcio Cunha; Hospital Mater Dei  
517 Betim-Contagem; Hospital Mater Dei Contorno; Hospital Mater Dei Santo Agostinho; Hospital  
518 Metropolitano Dr. Célio de Castro; Hospital Metropolitano Odilon Behrens; Hospital Moinhos de Vento;  
519 Hospital Nossa Senhora da Conceição; Hospital Regional Antônio Dias; Hospital Regional de Barbacena

520 Dr. José Américo; Hospital Regional do Oeste; Hospital Risoleta Tolentino Neves; Hospital Santa Cruz;  
521 Hospital Santa Rosália; Hospital São João de Deus; Hospital São Lucas da PUCRS; Hospital Semper;  
522 Hospital SOS Córdio; Hospital Tacchini; Hospital Unimed-BH; Hospital Universitário Canoas; Hospital  
523 Universitário Ciências Médicas; Hospital Universitário de Santa Maria.

524 We also thank all the clinical staff at those hospitals, who cared for the patients, and all undergraduate  
525 students who helped with data collection.

## 526 **References**

- 527 1. Dong E, Du H, Gardner L. An interactive web-based dashboard to track COVID-19 in real time. The  
528 Lancet Infectious Diseases. 2020 May;20(5):533–4.
- 529 2. Callaway E. Could new COVID variants undermine vaccines? Labs scramble to find out. Nature.  
530 2021 Jan 14;589(7841):177–8.
- 531 3. Fumagalli C, Rozzini R, Vannini M, Coccia F, Cesaroni G, Mazzeo F, et al. Clinical risk score to  
532 predict in-hospital mortality in COVID-19 patients: a retrospective cohort study. BMJ Open  
533 [Internet]. 2020 Sep 25;10(9):e040729. Available from:  
534 <https://bmjopen.bmj.com/lookup/doi/10.1136/bmjopen-2020-040729>
- 535 4. Marcolino MS, Pires MC, Ramos LEF, Silva RT, Oliveira LM, Carvalho RLR, et al. ABC2-SPH  
536 risk score for in-hospital mortality in COVID-19 patients: development, external validation and  
537 comparison with other available scores. International Journal of Infectious Diseases [Internet]. 2021  
538 Sep;110:281–308. Available from: <https://linkinghub.elsevier.com/retrieve/pii/S1201971221006056>
- 539 5. Gupta RK, Marks M, Samuels THA, Luintel A, Rampling T, Chowdhury H, et al. Systematic  
540 evaluation and external validation of 22 prognostic models among hospitalised adults with COVID-  
541 19: an observational cohort study. European Respiratory Journal [Internet]. 2020  
542 Dec;56(6):2003498. Available from: [http://erj.ersjournals.com/lookup/doi/10.1183/13993003.03498-](http://erj.ersjournals.com/lookup/doi/10.1183/13993003.03498-2020)  
543 2020

- 544 6. Borges do Nascimento IJ, Marcolino MS, Abdulazeem HM, Weerasekara I, Azzopardi-Muscat N,  
545 Gonçalves MA, et al. Impact of Big Data Analytics on People's Health: Overview of Systematic  
546 Reviews and Recommendations for Future Studies. *Journal of Medical Internet Research*. 2021 Apr  
547 13;23(4):e27275.
- 548 7. Bai HX, Wang R, Xiong Z, Hsieh B, Chang K, Halsey K, et al. Artificial Intelligence Augmentation  
549 of Radiologist Performance in Distinguishing COVID-19 from Pneumonia of Other Origin at Chest  
550 CT. *Radiology*. 2020 Sep;296(3):E156–65.
- 551 8. Mohnen SM, Rotteveel AH, Doornbos G, Polder JJ. Healthcare Expenditure Prediction with  
552 Neighbourhood Variables – A Random Forest Model. *Statistics, Politics and Policy*. 2020 Dec  
553 16;11(2):111–38.
- 554 9. Gomes C, Goncalves M, Rocha L, Canuto S. On the Cost-Effectiveness of Stacking of Neural and  
555 Non-Neural Methods for Text Classification: Scenarios and Performance Prediction. *Findings of the  
556 Association for Computational Linguistics: ACL-IJCNLP 2021*. 2021;4003–14.
- 557 10. Núñez-Gil IJ, Fernández-Pérez C, Estrada V, Becerra-Muñoz VM, El-Battrawy I, Uribarri A, et al.  
558 Mortality risk assessment in Spain and Italy, insights of the HOPE COVID-19 registry. *Internal and  
559 Emergency Medicine*. 2021 Jun 9;16(4):957–66.
- 560 11. Moons KGM, Altman DG, Reitsma JB, Ioannidis JPA, Macaskill P, Steyerberg EW, et al.  
561 Transparent Reporting of a multivariable prediction model for Individual Prognosis Or Diagnosis  
562 (TRIPOD): Explanation and Elaboration. *Annals of Internal Medicine*. 2015 Jan 6;162(1):W1–73.
- 563 12. Cunha W, Mangaravite V, Gomes C, Canuto S, Resende E, Nascimento C, et al. On the cost-  
564 effectiveness of neural and non-neural approaches and representations for text classification: A  
565 comprehensive comparative study. *Information Processing & Management*. 2021  
566 May;58(3):102481.
- 567 13. Li X, Ge P, Zhu J, Li H, Graham J, Singer A, et al. Deep learning prediction of likelihood of ICU  
568 admission and mortality in COVID-19 patients using clinical variables. *PeerJ*. 2020 Nov 6;8:e10337.

- 569 14. Marcolino MS, Ziegelmann PK, Souza-Silva MVR, Nascimento IJB, Oliveira LM, Monteiro LS, et  
570 al. Clinical characteristics and outcomes of patients hospitalized with COVID-19 in Brazil: Results  
571 from the Brazilian COVID-19 registry. *International Journal of Infectious Diseases*. 2021  
572 Jun;107:300–10.
- 573 15. Harris PA, Taylor R, Minor BL, Elliott V, Fernandez M, O’Neal L, et al. The REDCap consortium:  
574 Building an international community of software platform partners. *Journal of Biomedical  
575 Informatics*. 2019 Jul;95:103208.
- 576 16. Wolff RF, Moons KGM, Riley RD, Whiting PF, Westwood M, Collins GS, et al. PROBAST: A  
577 Tool to Assess the Risk of Bias and Applicability of Prediction Model Studies. *Annals of Internal  
578 Medicine*. 2019 Jan 1;170(1):51.
- 579 17. Brabec J, Machlica L. Bad practices in evaluation methodology relevant to class-imbalanced  
580 problems. 2018 Dec 4;
- 581 18. Cuadros-Rodríguez L, Pérez-Castaño E, Ruiz-Samblás C. Quality performance metrics in  
582 multivariate classification methods for qualitative analysis. *TrAC Trends in Analytical Chemistry*.  
583 2016 Jun;80:612–24.
- 584 19. Cunha W, Canuto S, Viegas F, Salles T, Gomes C, Mangaravite V, et al. Extended pre-processing  
585 pipeline for text classification: On the role of meta-feature representations, sparsification and  
586 selective sampling. *Information Processing & Management*. 2020 Jul;57(4):102263.
- 587 20. Vaswani A, Shazeer N, Parmar N, Uszkoreit J, Jones L, Gomez AN, Kaiser L PI. Attention is all you  
588 need. *Conference on Neural Information Processing System*. 2017;
- 589 21. Miyato T, Maeda S, Koyama M, Ishii S. Virtual Adversarial Training: A Regularization Method for  
590 Supervised and Semi-Supervised Learning. 2017 Apr 12;
- 591 22. Shwartz-Ziv R, Armon A. Tabular Data: Deep Learning is Not All You Need. 2021 Jun 6;

- 592 23. Ke G, Meng Q, Finley T, Wang T, Chen W, Ma W, et al. LightGBM: A highly efficient gradient  
593 boosting decision tree. *Advances in Neural Information Processing Systems*. 2017;2017-  
594 Decem:3147–55.
- 595 24. Salles T, Rocha L, Gonçalves M. A bias-variance analysis of state-of-the-art random forest text  
596 classifiers. *Advances in Data Analysis and Classification*. 2021 Jun 19;15(2):379–405.
- 597 25. Cutler DR, Edwards TC, Beard KH, Cutler A, Hess KT, Gibson J, et al. RANDOM FORESTS FOR  
598 CLASSIFICATION IN ECOLOGY. *Ecology*. 2007 Nov;88(11):2783–92.
- 599 26. Tzoulis P, Waung JA, Bagkeris E, Hussein Z, Biddanda A, Cousins J, et al. Dysnatremia is a  
600 Predictor for Morbidity and Mortality in Hospitalized Patients with COVID-19. *The Journal of*  
601 *Clinical Endocrinology & Metabolism*. 2021 May 13;106(6):1637–48.
- 602 27. Gunnerson KJ. Clinical review: the meaning of acid-base abnormalities in the intensive care unit part  
603 I - epidemiology. *Critical care (London, England)*. 2005 Oct 5;9(5):508–16.
- 604 28. Raphael KL, Murphy RA, Shlipak MG, Satterfield S, Huston HK, Sebastian A, et al. Bicarbonate  
605 Concentration, Acid-Base Status, and Mortality in the Health, Aging, and Body Composition Study.  
606 *Clinical Journal of the American Society of Nephrology*. 2016 Feb 5;11(2):308–16.
- 607 29. Pahal P, Hashmi MF, Sharma S. Chronic Obstructive Pulmonary Disease Compensatory Measures.  
608 *StatPearls*. 2021.
- 609 30. Lundberg SM, Erion G, Chen H, DeGrave A, Prutkin JM, Nair B, et al. From local explanations to  
610 global understanding with explainable AI for trees. *Nature Machine Intelligence*. 2020 Jan  
611 17;2(1):56–67.
- 612 31. Knight SR, Ho A, Pius R, Buchan I, Carson G, Drake TM, et al. Risk stratification of patients  
613 admitted to hospital with covid-19 using the ISARIC WHO Clinical Characterisation Protocol:  
614 development and validation of the 4C Mortality Score. *BMJ*. 2020 Sep 9;m3339.

- 615 32. Liang W, Liang H, Ou L, Chen B, Chen A, Li C, et al. Development and Validation of a Clinical  
616 Risk Score to Predict the Occurrence of Critical Illness in Hospitalized Patients With COVID-19.  
617 JAMA Internal Medicine. 2020 Aug 1;180(8):1081.
- 618 33. Bonanad C, García-Blas S, Tarazona-Santabalbina F, Sanchis J, Bertomeu-González V, Fácila L, et  
619 al. The Effect of Age on Mortality in Patients With COVID-19: A Meta-Analysis With 611,583  
620 Subjects. Journal of the American Medical Directors Association. 2020 Jul;21(7):915–8.
- 621 34. Chowdhury MEH, Rahman T, Khandakar A, Al-Madeed S, Zughailer SM, Doi SAR, et al. An early  
622 warning tool for predicting mortality risk of COVID-19 patients using machine learning. 2020 Jul  
623 29;
- 624 35. Aliberti MJR, Szejf C, Avelino Silva VI, Suemoto CK, Apolinario D, Dias MB, et al. COVID-19  
625 is not over and age is not enough: Using frailty for prognostication in hospitalized patients. Journal  
626 of the American Geriatrics Society. 2021 May 5;69(5):1116–27.
- 627 36. Bhargava A, Fukushima EA, Levine M, Zhao W, Tanveer F, Szpunar SM, et al. Predictors for  
628 Severe COVID-19 Infection. Clinical Infectious Diseases. 2020 Nov 5;71(8):1962–8.
- 629 37. Daher A, Balfanz P, Aetou M, Hartmann B, Müller-Wieland D, Müller T, et al. Clinical course of  
630 COVID-19 patients needing supplemental oxygen outside the intensive care unit. Scientific Reports.  
631 2021 Dec 26;11(1):2256.
- 632 38. Bashash D, Hosseini-Baharanchi FS, Rezaie-Tavirani M, Safa M, Akbari Dilmaghani N, Faranoush  
633 M, et al. The Prognostic Value of Thrombocytopenia in COVID-19 Patients; a Systematic Review  
634 and Meta-Analysis. Archives of academic emergency medicine. 2020;8(1):e75.
- 635 39. Zhang J, Cao Y, Tan G, Dong X, Wang B, Lin J, et al. Clinical, radiological, and laboratory  
636 characteristics and risk factors for severity and mortality of 289 hospitalized COVID-19 patients.  
637 Allergy. 2021 Feb 24;76(2):533–50.

- 638 40. Ouyang S-M, Zhu H-Q, Xie Y-N, Zou Z-S, Zuo H-M, Rao Y-W, et al. Temporal changes in  
639 laboratory markers of survivors and non-survivors of adult inpatients with COVID-19. BMC  
640 Infectious Diseases. 2020 Dec 11;20(1):952.
- 641 41. Izcovich A, Ragusa MA, Tortosa F, Lavena Marzio MA, Agnoletti C, Bengolea A, et al. Prognostic  
642 factors for severity and mortality in patients infected with COVID-19: A systematic review. Lazzeri  
643 C, editor. PLOS ONE. 2020 Nov 17;15(11):e0241955.
- 644 42. Raschke RA, Agarwal S, Rangan P, Heise CW, Curry SC. Discriminant Accuracy of the SOFA  
645 Score for Determining the Probable Mortality of Patients With COVID-19 Pneumonia Requiring  
646 Mechanical Ventilation. JAMA. 2021 Apr 13;325(14):1469.

647

## 648 **Supporting information**

649 **S1 Table. Main characteristics of the studies.** ARDS: acute respiratory distress syndrome; AST: aspartate  
650 transaminase; AUC: area under the curve; BMI: body mass index; BUN: blood urea nitrogen; CCEDRRN:  
651 canadian covid-19 emergency department rapid response network; CI: confidence interval; CKD: chronic  
652 kidney disease; COPD: chronic obstructive pulmonary disease; CPR: C-reactive protein; CT: computed  
653 tomography; DLN: deep learning networks; DM: diabetes mellitus; ED: emergency department; EH:  
654 emergency hospital; ER: emergency room; FiO<sub>2</sub>: fraction of inspired oxygen; GFR: glomerular filtration  
655 rate; GP: general practice; ICU: intensive care unit; IHD: ischemic heart disease; IL-6: interleukin 6; INR:  
656 international normalized ratio; LASSO: least absolute shrinkage and selection operator logistic regression;  
657 LDH: lactate dehydrogenase; MAP: mean arterial pressure; MICE: Multivariate Imputation by Chained  
658 Equations; NA: not applicable; NAAT: nucleic acid amplification test; NEWS2: national early warning  
659 score; NLR: neutrophil lymphocyte ratio; OP: outpatient; PLS: partial least squares; RDW: red blood cell  
660 distribution width; RF: Random Forest; RT-PCR: reverse transcription polymerase chain reaction; SF ratio:



661 SpO<sub>2</sub>/FiO<sub>2</sub> ratio; SVM: support-vector machine; Trop I: troponin I; XGBoost: eXtreme Gradient Boosting;  
662 WBC: white blood cell; WHO: World Health Organization.  
663 **S2 Table. Potential predictors included for the development of the models.** BMI: body mass index;  
664 COPD: chronic obstructive pulmonary disease; HIV: human immunodeficiency viruses; pO<sub>2</sub>: partial  
665 pressure of oxygen; PCO<sub>2</sub>: partial pressure of carbon dioxide; SF ratio: SpO<sub>2</sub>/FiO<sub>2</sub> ratio.
