# Supplementary material for: Effectiveness, Explainability and Reliability of Machine Meta-Learning Methods for Predicting Mortality in Patients with COVID-19: Results of the Brazilian COVID-19 Registry
Source: medRxiv preprint, doi:10.1101/2021.11.01.21265527, version 1 (2021-11-02)
Supplement: Table 2 [file 265527_file03.docx]

| **Table S2. Potential predictors included for the development of the models** |
| --- |
| **Variables** |
| **Demographics characteristics** |
| Sex at birth |
| Age (years) |
| **Comorbidities** |
| Hypertension |
| Coronary artery disease |
| Heart failure |
| Atrial fibrillation or flutter |
| Stroke |
| Chagas disease |
| Rheumatic heart disease |
| Other cardiovascular disease |
| No relevant cardiovascular disease |
| Asthma |
| COPD |
| Pulmonary fibrosis |
| Diabetes mellitus |
| Obesity (BMI>30 kg/m2) |
| Cirrhosis |
| Psychiatry disease |
| Chronic kidney disease |
| Rheumatologic disease |
| HIV infection |
| Cancer |
| Previous organ transplantation |
| Immunosuppressive condition |
| Another relevant health condition |
| Number of comorbidities |
| Number of cardiovascular comorbidities |
| **Lifestyle habits** |
| Illegal drug use |
| Alcoholism |
| Current smoker |
| Ex-smoker |
| **Clinical characteristics** |
| Time from symptom onset |
| Respiratory rate (irpm) |
| Heart rate (bpm) |
| Systolic blood pressure (mmHg) |
| Diastolic blood pressure (mmHg) |
| Inotrope use |
| Glasgow coma score |
| SF ratio |
| **Laboratory** |
| C reactive protein (mg/L) |
| Hemoglobin (g/L) |
| Leucocytes (109/L) |
| Neutrophils (109/L) |
| Lymphocytes (109/L) |
| Neutrophils-to-lymphocytes ratio |
| Platelet count (109/L) |
| Creatinine (mg/dL) |
| Urea (mg/dL) |
| Lactate (mmol/L) |
| Sodium (mmol/L) |
| Bicarbonate (mEq/L) |
| pH |
| pO2 (mmHg) |
| pCO2 (mmHg) |
| D-dimer |

BMI: body mass index; COPD: chronic obstructive pulmonary disease; HIV: human immunodeficiency viruses; pO2: partial pressure of oxygen; PCO2: partial pressure of carbon dioxide; SF ratio: SpO2/FiO2 ratio
